PRELIMINARY PROGRAM

1956 ANNUAL MEETING

AMERICAN SOCIETY OF ANESTHESIOLOGISTS, INC.  
MUNICIPAL AUDITORIUM, KANSAS CITY, MISSOURI

GENERAL SCIENTIFIC SESSIONS

MUSIC HALL

WEDNESDAY, OCTOBER 10, 1956

- MORNING: *Chemical Rhizotomy in Management of Intractable Pain*—Louis W. Lewis, M.D.  
*A Re-evaluation of Paravertebral Sympathetic Block for Peripheral Vascular Disease of the Lower Extremity*—D. LeRoy Crandell, M.D., William G. Page, M.D., and Harold Green, M.D.  
*Toxicity of Local Anesthetic Agents; A Pharmacological Re-evaluation*—John E. Steinhaus, M.D.  
*Clinical Evaluation of Local Anesthetic Drugs. II. The Use of Extradural Block as a Test Method*—John J. Bonica, M.D., Dale Hadfield, M.D., Benjamin F. Monk, M.D., William Crepps, M.D., Phillip H. Backup, M.D., and Charles E. Anderson, Jr., M.D.  
*Spinal Epidural (Peridural) Block; A Review and an Analysis of 2500 Cases*—Daniel C. Moore, M.D., and L. D. Bridenbaugh, M.D.  
*Peridural Anesthesia for Thoracic Surgery*—Oral B. Crawford, M.D., Charles Brasher, M.D., and W. W. Buckingham, M.D.  
*Epidural Analgesia for Cordotomy*—LeRoy W. Krumperman, M.D., Frederick Murtagh, M.D., and Mary Ruth Wester, M.D.

AFTERNOON: PANEL DISCUSSION

*Anesthesia for Cardiac Catheterization*

MODERATOR—Howard A. Bennett, M.D.

*Requirements and Problems*—Antoni M. Diehl, M.D.

*Management with Premedication and Local Anesthesia*—T. K. Lin, M.D.

*Management with Basal Narcosis*—Kenneth Keown, M.D.

*Management with General Anesthesia*—John W. Hansen, M.D.

*Evaluation of the Use of Electrocardiography During Congenital Heart Surgery*—Robert M. Smith, M.D., and H. P. Wiley, M.D.

*Induced Cardiac Arrest in Open Heart Surgery*—Donald E. Hale, M.D., Patrick P. Moraca, M.D., and Carl E. Wasmuth, M.D.

*Anesthesia for Open Cardiac Surgery. I. Experiences Using the Pump-Oxygenator in Humans*—David Mendelsohn, Jr., M.D., and Thomas N. MacKrell, M.D.
